# Supplementary material for: Phenotypic memory in Bacillus subtilis links dormancy entry and exit by a spore quantity-quality tradeoff
Source: PubMed Central journal article supplement (PMC5754360; doi:10.1038/s41467-017-02477-1), 2018-01-04
Supplement: 41467_2017_2477_MOESM1_ESM.pdf [file 41467_2017_2477_MOESM1_ESM.pdf]

## Supplementary Figures

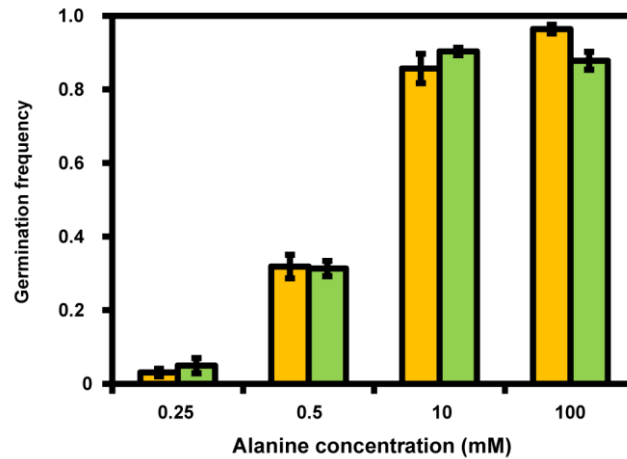

**Supplementary Figure 1. *Early* and *late* spores achieve comparable germination frequencies.** Germination frequency of *early* (yellow) and *late* spores (green) as a function of the L-alanine concentration that was used for stimulating spores after sporulation on agarose pads. See Methods for details. Results denote the final germination frequency after 2 hours upon which no further germination events were observed in the microcolonies. Strain: BIB1019. Data: mean  $\pm$  SEM,  $n_c = \geq 4$  ( $n_s = \geq 200$ ). Unpaired t-test: the differences between *early* and *late* spores are not significant ( $P > 0.05$ ).

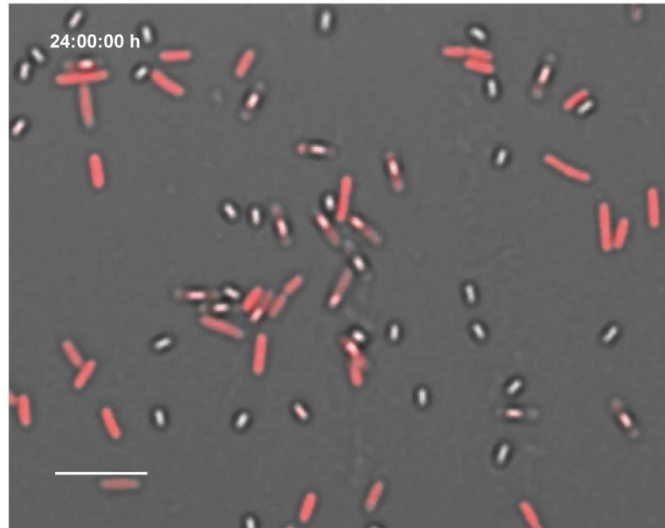

**Supplementary Figure 2. Micrograph of  $P_{rapA}$ -*mCherry* (BIB1126) cells from a culture that was cultivated for 24 h in liquid SM.** Spores that have been released from the sporangia do not show any fluorescence (*early* spores). Spores contained within mother cells show some fluorescence, cells that delay sporulation for even longer are strongly fluorescent. Scale bar: 5  $\mu$ m.

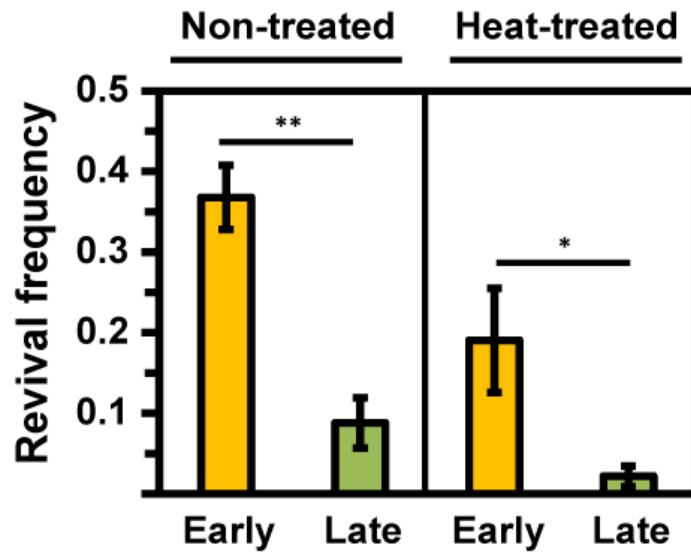

**Supplementary Figure 3. Effect of heat-treatment on differential spore revival.** Revival frequencies of *early* and *late* spores (BIB1126) which were heat-treated prior to induction with L-alanine on a SM pad. Data: mean  $\pm$  SEM,  $n = 4$  movies ( $n_s = \geq 700$ ), unpaired t-test: \*  $P \leq 0.05$ , \*\*  $P \leq 0.01$ .

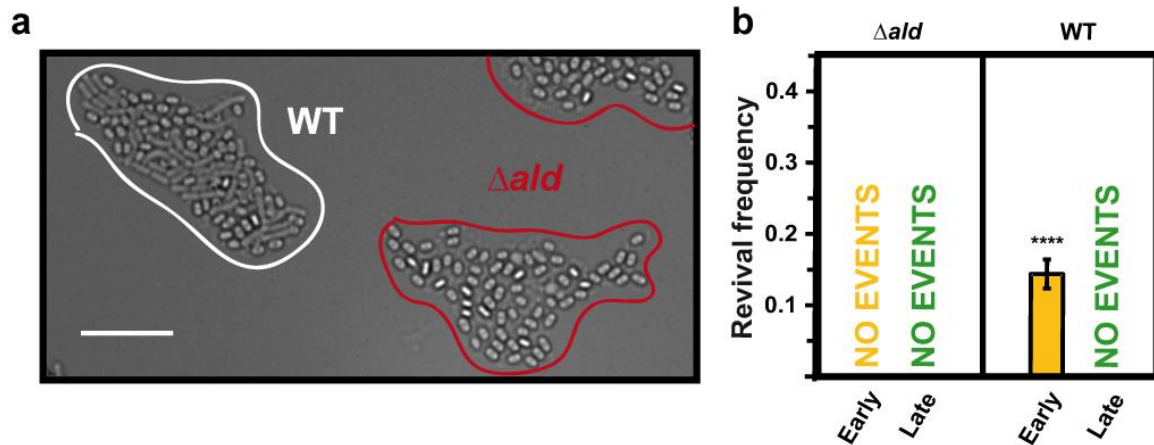

**Supplementary Figure 4. Effect of an *ald* gene knock-out.** (a) Bright-field image of a colony of an *ald* knock-out (BIB1416) that was co-cultured with a WT strain (BIB224). The *ald* strain carries the  $P_{trpE}$ -*mCherry* promoter fusion to distinguish it from the WT. A representative image of spore colonies at t=10 h *after* stimulation with L-alanine is shown. Several *early* WT spores have grown out successfully, while most *ald* mutant spores have germinated but none have grown out. See also Supplementary Movie 4. Scale bar: 10  $\mu$ m. (b) Corresponding revival frequencies. Strains: BIB1416, BIB224. Data: mean  $\pm$  SEM,  $n_c = \geq 8$  ( $n_s = \geq 500$ ), unpaired t-test: \*\*\*\*  $P \leq 0.0001$ .

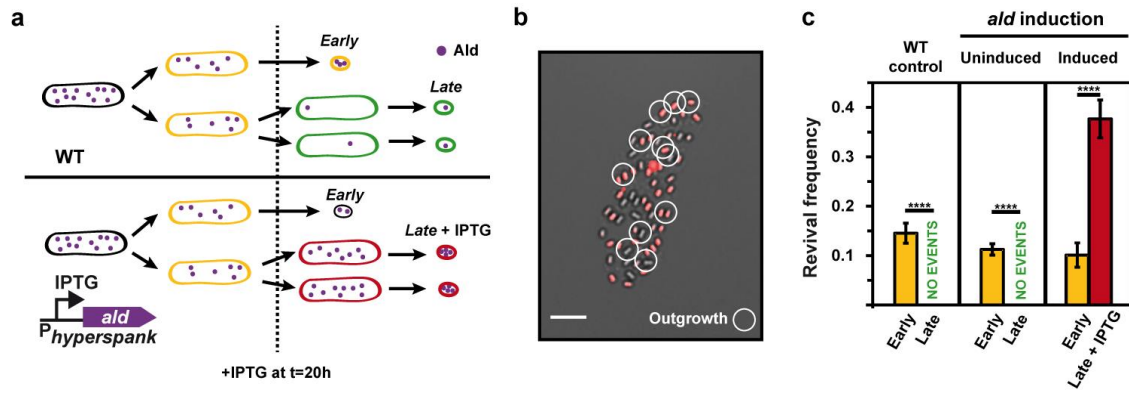

**Supplementary Figure 5. Effect of Ald-induction in the progenitor cells of *late* spores.** (a) Schematics illustrating the formation of *late* spores carrying low levels of Ald in the WT (top) and higher levels of Ald (bottom) formed by inducing *ald* expression from a  $\sigma^A$ -dependent promoter specifically in the progenitors of *late* spores. (b) Micrograph of a spore microcolony showing Ald-induced *late* spores in red. The bright-field image (gray) was overlaid with a fluorescence image of the  $P_{rapA}$ -*mCherry* reporter. Spores that grew out in response to L-alanine are circled. See also Supplementary Movie 5. Scale bar: 5  $\mu$ m. (c) Corresponding revival frequencies of *early* and *late* spores in response to L-alanine. Results from left to right show the WT, the uninduced control, and the induced strain as shown in (a) and (b). Strains: BIB1300 and BIB224 (WT), Data: mean  $\pm$  SEM,  $n_c = \geq 11$  ( $n_s = \geq 800$ ), unpaired t-test: \*\*\*\*  $P \leq 0.0001$ .

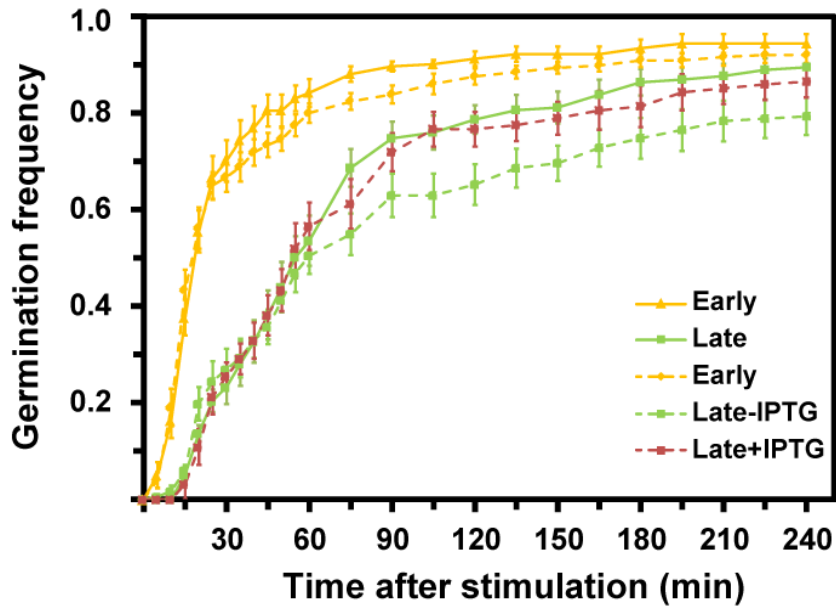

**Supplementary Figure 6. Ald does not affect the germination response to L-alanine.**

Germination frequency as a function of time after stimulating spore microcolonies with L-alanine at time  $t = 0$ . During the nutrient down-shift Ald expression was induced at  $t = 30$  h in the progenitor cells of (very) *late* spores (red). Their germination dynamics were comparable to WT *late* spores (green line) or *late* spores that had formed before the induction of Ald expression, i.e. between  $t = 20$  h and  $t = 30$  h (green dashed line). The germination dynamics of *early* spores (yellow) are included as a reference in each case. Strain: BIB1300 and BIB224 (WT), Data: mean  $\pm$  SEM,  $n_c = \geq 8$  ( $n_s = \geq 350$ ).

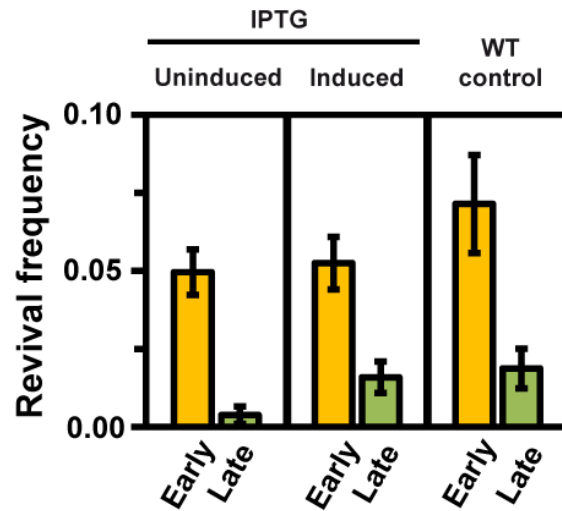

**Supplementary Figure 7. Ald does not affect the spore revival frequency in response to stimulation with AGFK.** Revival frequency (after 8 h) in response to stimulation with AGFK at  $t = 0$  h. During sporulation BIB1300 was induced with IPTG at  $t = 20$  h and compared to the uninduced control. The data for the WT strain is included for reference. Strains: BIB1300, BIB224 (WT). Data: mean  $\pm$  SEM,  $n_c = \geq 12$  ( $n_s = \geq 900$ ). Unpaired t-test: The difference between induced and uninduced spores is not significant ( $P > 0.05$ ).

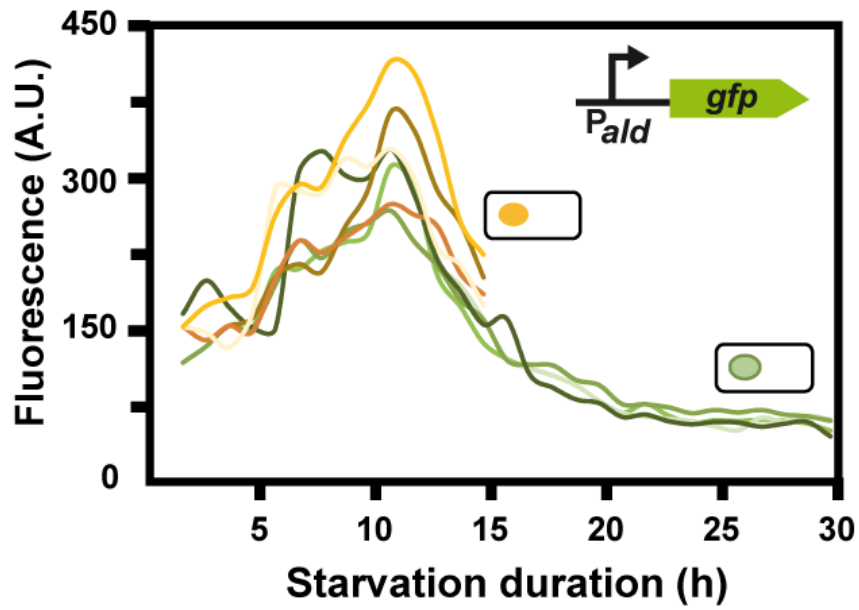

**Supplementary Figure 8. Cells down-regulate the *ald* promoter during starvation.** Fluorescence trajectories for single cells carrying a  $P_{ald}$ -*gfp* reporter (BIB1213). Yellowish (greenish) denote the trajectories for cells that give rise to *early* (*late*) spores. The trajectories were terminated when a pre-spore became visible.



## Supplementary Tables

**Supplementary Table 1. Vectors used in this work**

| Accession Number | Vector    | Genotype                                                                                        | Source                               |
|------------------|-----------|-------------------------------------------------------------------------------------------------|--------------------------------------|
| EIB380           | pGFP_Star | ' <i>amyE cat TgyrA LICS promoterless gfpmut3 amyE' bla ColE1 origin</i>                        | Ref. 1                               |
| EIB422           | pRFP_Star | ' <i>amyE cat TgyrA LICS promoterless mcherry amyE' bla ColE1 origin</i>                        | This work                            |
| EIB303           | pDR111    | ' <i>amyE spec<sup>R</sup> TrrnB T<sub>0</sub>λ Phyperspank-MCS lacI amyE' bla ColE1 origin</i> | David Rudner, Harvard Medical School |
|                  | pDR110    | ' <i>amyE spec<sup>R</sup> TrrnB T<sub>0</sub>λ Pspank-MCS lacI amyE' bla ColE1 origin</i>      | David Rudner, Harvard Medical School |
| EIB7             | pSac-KAN  | ' <i>sacA kan<sup>R</sup> MCS sacA' bla puc18 origin</i>                                        | Ref. 2                               |
| EIB25            | pDG1514   | ' <i>MCS par tet<sup>R</sup> lacZ' bla pMB1 origin</i>                                          | Ref. 3                               |

**Supplementary Table 2. Plasmids used in this work**

| Accession Number | Plasmid                                | Genotype                                                                                                       | Source    |
|------------------|----------------------------------------|----------------------------------------------------------------------------------------------------------------|-----------|
| EIB432           | pRFP_Star_P <sub>rapAII</sub>          | ' <i>amyE cat<sup>R</sup> TgyrA P<sub>rapAII</sub>-mcherry amyE' bla ColE1 origin</i>                          | This work |
| EIB404           | pGFP_Star_P <sub>spoIIIE</sub>         | ' <i>amyE cat<sup>R</sup> TgyrA P<sub>spoIIIE</sub>-gfpmut3 amyE' bla ColE1 origin</i>                         | This work |
| EIB450           | pGFP_Star_P <sub>ald</sub>             | ' <i>amyE cat<sup>R</sup> TgyrA LICS P<sub>ald</sub>-gfpmut3 amyE' bla ColE1 origin</i>                        | This work |
| EIB499           | pGFP_Star_P <sub>ald-ald-mCherry</sub> | ' <i>amyE cat<sup>R</sup> P<sub>ald-ald</sub>-mCherry TgyrA P<sub>ald</sub>-gfpmut3 amyE' bla ColE1 origin</i> | This work |
| EIB452           | pDR111_ald                             | ' <i>amyE spec<sup>R</sup> P<sub>hyperspank-ald</sub> lacI amyE' bla ColE1 origin</i>                          | This work |
| EIB297           | pDR111_rapA                            | ' <i>amyE spec<sup>R</sup> P<sub>hyperspank-rapA</sub> lacI amyE' bla ColE1 origin</i>                         | This work |
| EIB419           | pDR110_kinA / 04F14                    | ' <i>amyE spec<sup>R</sup> P<sub>spank-kinA</sub> lacI amyE' bla ColE1 origin</i>                              | Ref. 4    |
| EIB480           | pSac-KAN_P <sub>hyperspank-ald</sub>   | ' <i>sacA P<sub>hyperspank-ald</sub> lacI kan<sup>R</sup> sacA' bla ColE1 origin f1(+) origin</i>              | This work |
| EIB503           | pSac-KAN_P <sub>ald-ald-mCherry</sub>  | ' <i>sacA P<sub>ald-ald</sub>-mCherry lacI kan<sup>R</sup> sacA' bla ColE1 origin f1(+) origin</i>             | This work |

**Supplementary Table 3. Strains used in this work**

| Strains            | Name                                                                     | Genotype                                                                                                                                                                   | Source                                |
|--------------------|--------------------------------------------------------------------------|----------------------------------------------------------------------------------------------------------------------------------------------------------------------------|---------------------------------------|
| <i>E. coli</i>     |                                                                          |                                                                                                                                                                            |                                       |
|                    | DH5α                                                                     | <i>F<sup>-</sup> φ80lacZΔM15 Δ(lacZYA-argF)UI169 recA1 endA1 hsdR17(r<sub>k</sub><sup>-</sup>, m<sub>k</sub><sup>+</sup>) phoA supE44 thi-1 gyrA96 relA1 λ<sup>-</sup></i> | Invitrogen                            |
|                    |                                                                          |                                                                                                                                                                            |                                       |
| <i>B. subtilis</i> |                                                                          |                                                                                                                                                                            |                                       |
| <b>BIB224</b>      | 168 1A700                                                                | <i>trpC2</i>                                                                                                                                                               | BGSC                                  |
| <b>BIB182</b>      | 168 P <sub>trpE*</sub> -mcherry<br>P <sub>spo0F-yfp</sub> / JL028        | <i>amyE</i> ::[P <sub>spo0F-yfp</sub> <i>cat</i> <sup>R</sup> ]<br><i>ppsB</i> ::[P <sub>trpE*</sub> -mcherry <i>ery</i> <sup>R</sup> ]                                    | Ref. 5                                |
| <b>BIB444</b>      | 168 P <sub>trpE*</sub> -mcherry                                          | <i>trpC2 ppsB</i> ::[P <sub>trpE*</sub> -mcherry <i>ery</i> <sup>R</sup> ]                                                                                                 | See methods                           |
| <b>BIB1019</b>     | 168 P <sub>spoIIIE-gfp</sub><br>P <sub>trpE</sub> -mcherry               | <i>trpC2</i><br><i>amyE</i> ::[TgyrA P <sub>spoIIIE-gfp</sub> mut3 <i>cat</i> <sup>R</sup> ]<br><i>ppsB</i> ::[P <sub>trpE*</sub> -mcherry <i>ery</i> <sup>R</sup> ]       | BIB444<br>transformed<br>with EIB404  |
| <b>BIB1126</b>     | 168 P <sub>rapAII</sub> -mcherry                                         | <i>trpC2</i><br><i>amyE</i> ::[TgyrA P <sub>rapAII</sub> -mcherry <i>cat</i> <sup>R</sup> ]                                                                                | BIB224<br>transformed<br>with EIB432  |
| <b>BIB1416</b>     | 168 <i>ald</i> :: <i>tet</i> <sup>R</sup><br>P <sub>trpE*</sub> -mcherry | <i>trpC2 ald</i> :: <i>tet</i> <sup>R</sup><br><i>ppsB</i> ::[P <sub>trpE*</sub> -mcherry <i>ery</i> <sup>R</sup> ]                                                        | See methods                           |
| <b>BIB1213</b>     | 168 P <sub>ald-gfp</sub>                                                 | <i>trpC2 amyE</i> ::[TgyrA P <sub>ald-gfp</sub> mut3<br><i>lacI cat</i> <sup>R</sup> ]                                                                                     | BIB224<br>transformed<br>with EIB450  |
| <b>BIB1300</b>     | 168 P <sub>rapAII</sub> -mcherry<br>P <sub>hyperspank-ald</sub>          | <i>trpC2</i><br><i>amyE</i> ::[TgyrA P <sub>rapAII</sub> -mcherry <i>cat</i> <sup>R</sup> ]<br><i>sacA</i> ::[P <sub>hyperspank-ald</sub> <i>lacI kan</i> <sup>R</sup> ]   | BIB1126<br>transformed<br>with EIB480 |
| <b>BIB1423</b>     | 168 P <sub>ald-ald</sub> -<br>mcherry P <sub>ald-gfp</sub>               | <i>trpC2</i><br><i>amyE</i> ::[P <sub>ald-ald</sub> -mcherry <i>cat</i> <sup>R</sup> TgyrA<br>P <sub>ald-gfp</sub> mut3]                                                   | BIB224<br>transformed<br>with EIB499  |
| <b>BIB1332</b>     | 168 P <sub>spank-kinA</sub>                                              | <i>trpC2 amyE</i> ::[P <sub>spank-kinA</sub> <i>lacI spec</i> <sup>R</sup> ]                                                                                               | BIB224<br>transformed<br>with EIB419  |
| <b>BIB1330</b>     | 168 P <sub>hyperspank-rapA</sub>                                         | <i>trpC2 amyE</i> ::[P <sub>hyperspank-rapA</sub> <i>lacI</i><br><i>spec</i> <sup>R</sup> ]                                                                                | BIB224<br>transformed<br>with EIB297  |
| <b>BIB1440</b>     | 168 P <sub>spank-kinA</sub><br>P <sub>ald-ald</sub> -mcherry             | <i>trpC2</i><br><i>amyE</i> ::[P <sub>spank-kinA</sub> <i>lacI spec</i> <sup>R</sup> ]<br><i>sacA</i> ::[P <sub>ald-ald</sub> -mcherry <i>lacI kan</i> <sup>R</sup> ]      | BIB1332<br>transformed<br>with EIB503 |
| <b>BIB1442</b>     | 168 P <sub>hyperspank-rapA</sub><br>P <sub>ald-ald</sub> -mcherry        | <i>trpC2</i><br><i>amyE</i> ::[P <sub>hyperspank-rapA</sub> <i>lacI spec</i> <sup>R</sup> ]<br><i>sacA</i> ::[P <sub>ald-ald</sub> -mcherry <i>lacI kan</i> <sup>R</sup> ] | BIB1330<br>transformed<br>with EIB503 |

Supplementary Table 4. Primers used in this work

| Primer       | Sequence 5' – 3' (LIC-site underlined; overlap in gray italics; Restriction cut-site in bold) | Purpose                  |
|--------------|-----------------------------------------------------------------------------------------------|--------------------------|
| ST162        | CATAGTAGTTCCTCCTTCCCGGGAAAGC                                                                  | pRFP_Star                |
| ST219        | <i>CGGGAAGGAGGAACTACT</i> ATGGTTTCCAAGGGCG<br>AGG                                             | pRFP_Star                |
| ST220        | <i>CCAAGCTCAGCTAATTAAGCTT</i> ATTTGTACAGCTC<br>ATCCATGCCAC                                    | pRFP_Star                |
| ST221        | GCTTAATTAGCTGAGCTTGGACTCC                                                                     | pRFP_Star                |
| ST1          | <u>CCGC</u> GGGCTTTCCAGCTAAAAGAAAGCACGGG<br>TGTTTG                                            | PrapAII up<br>fragment   |
| ST222        | <i>AATCGTCTGCTTCATCCTTTTGA</i> ATTACCCGAGAT<br>ATGTC                                          | PrapAII up<br>fragment   |
| ST223        | AGGATGAAGCAGACGATTCCGTC                                                                       | PrapAII down<br>fragment |
| ST224        | <u>GTTCCCTCCTTCCCACCCCTTCG</u> ATGTCTTCTAAC<br>AATTCTG                                        | PrapAII down<br>fragment |
| ST209        | <u>CCGC</u> GGGCTTTCCAGCTCCTAACAAATCGGTTT<br>CTC                                              | PspoIII                  |
| ST210        | <u>GTTCCCTCCTTCCCACCACCTG</u> TATATTCGTTGCC<br>TG                                             | PspoIII                  |
| ST16         | GGTAAGTTTTCCGTATGTTGC                                                                         | Seq pGFP_Star            |
| ST17         | GTGAATTTAGGAGGCTTACTTG                                                                        | Seq pXFP_Star            |
| ST243        | GTCTGGGTGCCTTCATAC                                                                            | Seq pRFP_Star            |
| ST133        | TCAGCTCGCATACCGAATTAAG                                                                        | PtrepE-mcherry           |
| ST134        | ATGCCTAACACCAGCCATCC                                                                          | PtrepE-mcherry           |
| SS34         | <b>TATATAGCTAGCATATGACATATCTCGGGTAAT</b><br>TCAAAAGG                                          | rapA_fw                  |
| SS37         | <b>TATATAGCATGCGACCGCAACGAGCAACAAAC</b><br>CTGACATC                                           | rapA_rev                 |
| MA34         | <u>CCGC</u> GGGCTTTCCAGCGCGGGCCATTATAATTA<br>CTC                                              | Pald_fw                  |
| MA35         | <u>GTTCCCTCCTTCCCACCCCTGT</u> ATATGTGATATTTT<br>TAGTGTAGC                                     | Pald_rev                 |
| MA37         | <b>ATAGCTAGCTATCACATATACAGGAGGAGACA</b><br>G                                                  | ald_fw                   |
| MA38         | <b>ATAGCATGCGTCATAATTCGTGAAATGGTCTC</b>                                                       | ald_rev                  |
| MA47         | <b>ATAACTAGTTGGCCTTTTTCGTTTCTAC</b>                                                           | Phyperspank_ald_f<br>w   |
| MA48         | <b>ATAGAGCTCTTTCCTTACGCGAAATACGG</b>                                                          | Phyperspank_ald_r<br>ev  |
| SONSEQ1<br>8 | ATGGCAAGAACGTTGCTCGA                                                                          | Seq pDR111               |
| SONSEQ1<br>9 | TACGTACGATCTTTCAGCCG                                                                          | Seq pDR111               |
| MA49         | GTGACGATCATTGACTTAAACG                                                                        | Seq Phyp_ald             |

|              |                                                          |                                                          |
|--------------|----------------------------------------------------------|----------------------------------------------------------|
| <b>MA50</b>  | ATATTCAAACGGAGGGAGACG                                    | Seq Phyp_ald                                             |
| <b>ST39</b>  | CTGGTCGGAGATTGGGATGATAG                                  | Check for chromosomal integration into <i>amyE</i> locus |
| <b>ST40</b>  | AATTTCCATGTTGCGTAAGTCAG                                  | Check for chromosomal integration into <i>amyE</i> locus |
| <b>ST283</b> | GCTCAATATGTCGTCATTACAGGC                                 | Check for chromosomal integration into <i>sacA</i> locus |
| <b>ST284</b> | GCAGGGCTAATTGCAGATATAGG                                  | Check for chromosomal integration into <i>sacA</i> locus |
| <b>ST129</b> | ATGAGTATTCAACATTTCCGTGTC                                 | Check for single crossover                               |
| <b>ST130</b> | TTACCAATGCTTAATCAGTGAGG                                  | Check for single crossover                               |
| <b>MA51</b>  | GATGAAGATCTGCTGACATTG                                    | ald up_f                                                 |
| <b>MA52</b>  | CGAGCGCCTACGAGGAATTTGTATCGGGAACCC<br>CTATGATCATATC       | ald up_r                                                 |
| <b>MA53</b>  | CCTATCACCTCAAATGGTTCGCTGGATCTAGGCT<br>ATGAGTATGTTCC      | ald down_f                                               |
| <b>MA54</b>  | CCAAACAGCCTAAAGACTG                                      | ald down_r                                               |
| <b>LA54</b>  | CAGCGAACCATTTGAGGTGATAGGTCTTGCAAT<br>GGTGCAGGTTGTTCTC    | Tet fwd                                                  |
| <b>LA56</b>  | CGATACAAATTCCTCGTAGGCGCTCGGGAACCTC<br>TCTCCCAAAGTTGATCCC | Tet rev                                                  |
| <b>LA58</b>  | CATCGGTCATAAAAATCCGTAATGC                                | Tet check rev                                            |
| <b>KN1</b>   | TCATATCAGCGACGTTCTGC                                     | Ald-up-check                                             |
| <b>KN4</b>   | CTGGTGCTGGAATGAGTTTGCT                                   | Tet check fwd                                            |
| <b>KN3</b>   | AAATGCGGATGGCACATATT                                     | Ald-do-check                                             |
| <b>MA55</b>  | <b>ATAGGTACCGCGGGCCATTATAATTACTC</b>                     | Pald_ald fw                                              |
| <b>MA56</b>  | <i>GGAACCTCCACCTCCAGCACCCGCCACAGATGAT</i>                | Pald_ald rev                                             |
| <b>MA57</b>  | <i>GTGCTGGAGGTGGAGGTTCCGTTTCCAAGGGCGA<br/>GGAG</i>       | mcherry fw                                               |
| <b>MA58</b>  | <b>ATAGGATCCTTATTTGTACAGCTCATCCATGCC</b>                 | mcherry rev                                              |

## Supplementary References

1. Trauth, S. & Bischofs, I. B. Ectopic integration vectors for generating fluorescent promoter fusions in *Bacillus subtilis* with minimal dark noise. *PLoS One* **9**, e98360 (2014).
2. Middleton, R. & Hofmeister, A. New shuttle vectors for ectopic insertion of genes into *Bacillus subtilis*. *Plasmid* **51**, 238–245 (2004).
3. Guérout-Fleury, A. M., Shazand, K., Frandsen, N. & Stragier, P. Antibiotic-resistance cassettes for *Bacillus subtilis*. *Gene* **167**, 335–336 (1995).
4. de Jong, I. G., Veening, J.-W. & Kuipers, O. P. Heterochronic phosphorelay gene expression as a source of heterogeneity in *Bacillus subtilis* spore formation. *J. Bacteriol.* **192**, 2053–67 (2010).
5. Levine, J. H., Fontes, M. E., Dworkin, J. & Elowitz, M. B. Pulsed feedback defers cellular differentiation. *PLoS Biol.* **10**, e1001252 (2012).
